# Supplementary material for: Influence of copper and potassium on the structure and carbidisation of supported iron catalysts for Fischer–Tropsch synthesis
Source: Royal Society of Chemistry journal article supplement (doi:10.1039/c6cy02676a), 2017-01-01
Supplement: c6cy02676a1.pdf [file c6cy02676a1.pdf]

### Electronic Supplementary Information

#### Influence of Copper and Potassium on the Structure and Carbidisation of Supported Iron Catalysts for Fischer-Tropsch Synthesis

Petr A. Chernavskii, Vladislav O. Kazak, Galina V. Pankina, Yuri D. Perfiliev, Tong Li, Mirella Virginie, Andrei Y. Khodakov

**Table S1.** Mössbauer parameters

| Catalyst                | Iron forms | $\delta$ , mm/s | $\Delta$ , mm/s | $\Gamma$ , mm/s | H, kOe   | A, % | $\chi^2$ |
|-------------------------|------------|-----------------|-----------------|-----------------|----------|------|----------|
| 15% Fe                  | Fe 1       | 0.34(4)         | 0.90(14)        | 0.73(18)        | 501.1(3) | 6    | 1.5      |
|                         | Fe 2       | 0.29(10)        | 0.48(18)        | 0.62            |          | 4    |          |
|                         | Fe 3       | 0.59(4)         |                 | 0.37(8)         |          | 2    |          |
|                         | Fe 4       |                 |                 |                 |          | 88   |          |
| 15% Fe<br>1% K          | Fe 1       | 0.30(1)         | 0.93(7)         | 0.54(8)         | 502.0(4) | 13   | 1.0      |
|                         | Fe 2       | 0.35(1)         | 0.46(4)         | 0.39(5)         |          | 9    |          |
|                         | Fe 3       |                 |                 |                 |          |      |          |
|                         | Fe 4       |                 |                 |                 |          | 78   |          |
| 15% Fe<br>1% K<br>1% Cu | Fe 1       | 0.296(8)        | 0.90(2)         | 0.51(3)         | 493.7(2) | 16   | 4.3      |
|                         | Fe 2       | 0.340(5)        | 0.56(1)         | 0.45(2)         |          | 25   |          |
|                         | Fe 3       |                 | 0.1(9)          |                 |          | 4    |          |
|                         | Fe 4       |                 |                 |                 |          | 55   |          |
| 15% Fe<br>1% Cu         | Fe 1       | 0.336(7)        | 0.91(1)         | 0.58(3)         | 504.7(5) | 22   | 1.4      |
|                         | Fe 2       | 0.367(6)        | 0.47(2)         | 0.39(3)         |          | 13   |          |
|                         | Fe 3       |                 |                 |                 |          |      |          |
|                         | Fe 4       |                 |                 |                 |          | 65   |          |

The errors in the last digits are given in parentheses.  $\delta$  is the isomer shift.  $\Delta$  is the quadrupole splitting. H is the magnetic hyperfine field.  $\Gamma$  is the full line width at half maximum. A is relative area of spectral component, representing the relative content of the corresponding Fe species assuming a common recoilless fraction for all iron species in a sample and  $\chi^2$  is the deviation.

**Table S2.** Effective activation energies, pre-exponential factors and calculated rate constants for Fe<sub>2</sub>O<sub>3</sub> reduction to Fe<sub>3</sub>O<sub>4</sub> in CO and syngas

| Catalyst | Reduction by CO |                   |                                       |              |                      |                                       | Reduction by H <sub>2</sub> /CO |                   |                                       |              |                   |                                       |
|----------|-----------------|-------------------|---------------------------------------|--------------|----------------------|---------------------------------------|---------------------------------|-------------------|---------------------------------------|--------------|-------------------|---------------------------------------|
|          | $\alpha=0.1$    |                   |                                       | $\alpha=0.8$ |                      |                                       | $\alpha=0.1$                    |                   |                                       | $\alpha=0.8$ |                   |                                       |
|          | E, kJ/mol       | $k_0, s^{-1}$     | K, gm <sup>-2</sup> s <sup>-1</sup> * | E, kJ/mol    | $k_0, s^{-1}$        | K, gm <sup>-2</sup> s <sup>-1</sup> * | E, kJ/mol                       | $k_0, s^{-1}$     | K, gm <sup>-2</sup> s <sup>-1</sup> * | E, kJ/mol    | $k_0, s^{-1}$     | K, gm <sup>-2</sup> s <sup>-1</sup> * |
| Fe       | 118.9           | $6.19 \cdot 10^8$ | $9.3 \cdot 10^{-3}$                   | 197.0        | $2.55 \cdot 10^{15}$ | $2.9 \cdot 10^{-3}$                   | 74.4                            | $1.13 \cdot 10^5$ | $1.9 \cdot 10^{-2}$                   | 55.3         | $7.68 \cdot 10^2$ | $7.0 \cdot 10^{-3}$                   |
| FeCu     | 83.6            | $4.81 \cdot 10^5$ | $1.0 \cdot 10^{-2}$                   | 104.9        | $1.69 \cdot 10^7$    | $4.1 \cdot 10^{-3}$                   | 73.8                            | $1.63 \cdot 10^5$ | $2.8 \cdot 10^{-2}$                   | 80.4         | $3.26 \cdot 10^5$ | $1.5 \cdot 10^{-2}$                   |
| FeK      | 104.0           | $4.84 \cdot 10^6$ | $1.3 \cdot 10^{-3}$                   | 186.6        | $4.59 \cdot 10^{13}$ | $3.6 \cdot 10^{-4}$                   | 95.9                            | $1.50 \cdot 10^6$ | $2.3 \cdot 10^{-3}$                   | 107.4        | $1.03 \cdot 10^7$ | $1.4 \cdot 10^{-3}$                   |
| FeCuK    | 97.9            | $1.00 \cdot 10^7$ | $0.9 \cdot 10^{-2}$                   | 143.4        | $5.87 \cdot 10^{10}$ | $3.6 \cdot 10^{-3}$                   | 96.2                            | $1.75 \cdot 10^7$ | $2.2 \cdot 10^{-2}$                   | 125.0        | $2.72 \cdot 10^9$ | $8.0 \cdot 10^{-3}$                   |

\* the rate constants are calculated for the temperature of 288°C (in CO) and at 312 °C (in syngas)

**Table S3.** Effective activation energies, pre-exponential factors and calculated rate constants for carbidisation ( $\text{Fe}_3\text{O}_4 \rightarrow x\text{-Fe}_5\text{C}_2$ ) in CO and syngas

| Catalyst | In the presence of CO |                      |                                       |              |                      |                                       | In the presence of H <sub>2</sub> /CO |                      |                                       |              |                      |                                       |
|----------|-----------------------|----------------------|---------------------------------------|--------------|----------------------|---------------------------------------|---------------------------------------|----------------------|---------------------------------------|--------------|----------------------|---------------------------------------|
|          | $\alpha=0.1$          |                      |                                       | $\alpha=0.6$ |                      |                                       | $\alpha=0.1$                          |                      |                                       | $\alpha=0.6$ |                      |                                       |
|          | E, kJ/mol             | $k_0, \text{s}^{-1}$ | $K, \text{gm}^{-2}\text{s}^{-1}$<br>* | E, kJ/mol    | $k_0, \text{s}^{-1}$ | $K, \text{gm}^{-2}\text{s}^{-1}$<br>* | E, kJ/mol                             | $k_0, \text{s}^{-1}$ | $K, \text{gm}^{-2}\text{s}^{-1}$<br>* | E, kJ/mol    | $k_0, \text{s}^{-1}$ | $K, \text{gm}^{-2}\text{s}^{-1}$<br>* |
| Fe       | 69.8                  | $2.47 \cdot 10^2$    | $1.1 \cdot 10^{-4}$                   | 96.9         | $5.99 \cdot 10^3$    | $8.7 \cdot 10^{-6}$                   | 99.0                                  | $2.52 \cdot 10^5$    | $2.3 \cdot 10^{-4}$                   | 103.0        | $2.83 \cdot 10^5$    | $1.1 \cdot 10^{-4}$                   |
| FeCu     | 86.0                  | $2.19 \cdot 10^4$    | $2.8 \cdot 10^{-4}$                   | 110.9        | $7.68 \cdot 10^5$    | $5.3 \cdot 10^{-5}$                   | 49.6                                  | $3.13 \cdot 10^1$    | $1.4 \cdot 10^{-3}$                   | 48.2         | $1.42 \cdot 10^1$    | $5.2 \cdot 10^{-4}$                   |
| FeK      | 105.8                 | $8.77 \cdot 10^5$    | $1.7 \cdot 10^{-4}$                   | 165.9        | $1.98 \cdot 10^{10}$ | $1.2 \cdot 10^{-5}$                   | 68.3                                  | $6.13 \cdot 10^2$    | $3.1 \cdot 10^{-4}$                   | 85.2         | $6.37 \cdot 10^3$    | $9.0 \cdot 10^{-5}$                   |
| FeCuK    | 117.6                 | $2.17 \cdot 10^7$    | $4.3 \cdot 10^{-4}$                   | 148.9        | $4.27 \cdot 10^9$    | $8.3 \cdot 10^{-5}$                   | 93.8                                  | $3.24 \cdot 10^5$    | $6.8 \cdot 10^{-4}$                   | 131.0        | $1.74 \cdot 10^8$    | $1.7 \cdot 10^{-4}$                   |

\* the rate constants are calculated for the temperature of 410 °C
